# Supplementary material for: Efficient hydrogenolysis of cellulose into sorbitol catalyzed by a bifunctional catalyst
Source: Royal Society of Chemistry journal article supplement (doi:10.1039/c3gc41917g), 2013-12-09
Supplement: c3gc41917g.pdf [file c3gc41917g.pdf]

## Supporting Information

### Efficient Hydrogenolysis of Cellulose into Sorbitol Catalyzed by a Bifunctionalized Catalyst

Wenwen Zhu<sup>a</sup>, Hanming Yang<sup>b</sup>, Jizhong Chen<sup>a</sup>, Chen Chen<sup>a</sup>, Li Guo<sup>a</sup>, Huimei Gan<sup>a</sup>,  
Xiuge Zhao<sup>a</sup>, Zhenshan Hou<sup>a,\*</sup>

<sup>a</sup> Key Laboratory for Advanced Materials, Research Institute of Industrial Catalysis, East China University of Science and Technology, Shanghai, 200237, P. R. China.

E-mail: houzhenshan@ecust.edu.cn

<sup>b</sup> Key Laboratory of Catalysis and Materials Science of the State Ethnic Affairs Commission and Ministry of Education, Hubei Province, South-Central University for Nationalities, Wuhan, 430074, P. R. China.

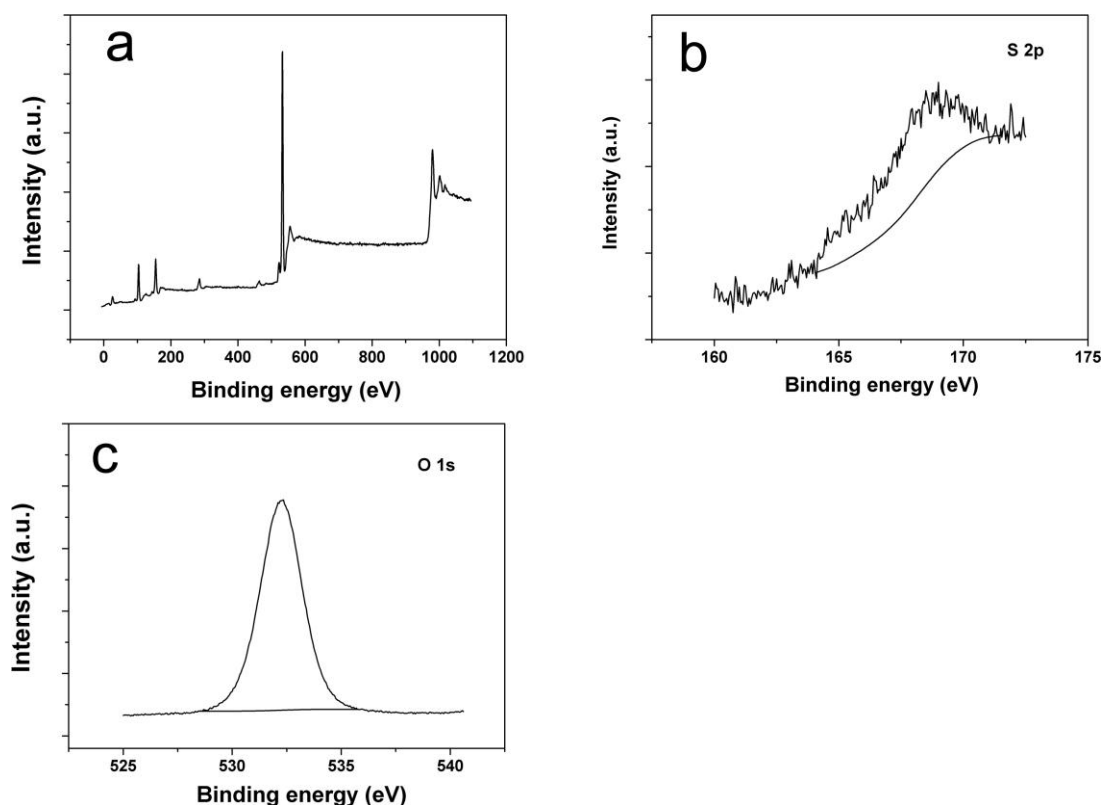

Figure 1S. XPS of a) Ru/SiO<sub>2</sub>-SO<sub>3</sub>H, b) S 2p in Ru/SiO<sub>2</sub>-SO<sub>3</sub>H and c) O 1s in Ru/SiO<sub>2</sub>-SO<sub>3</sub>H.

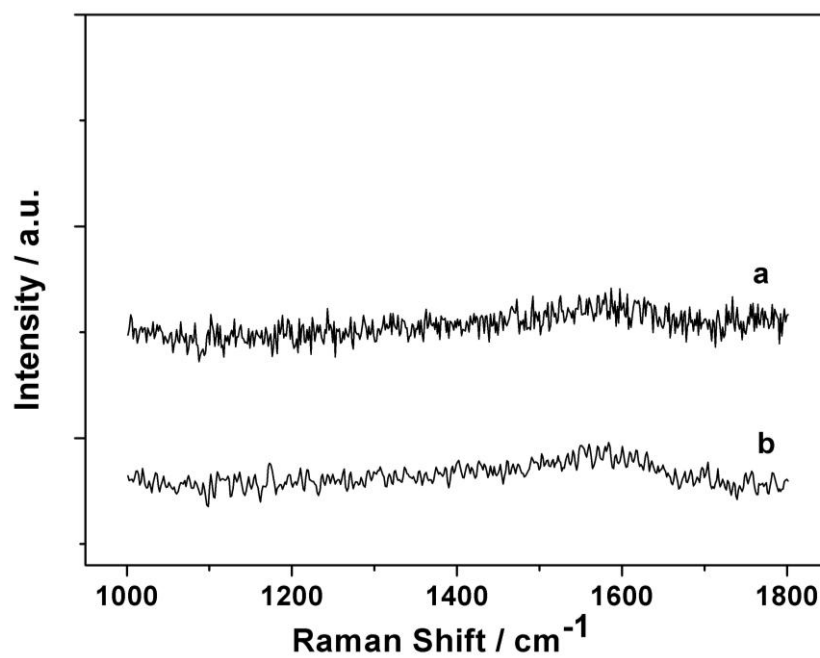

Figure 2S. Raman spectra of a) the fresh catalyst, b) the spent catalyst.
